# Supplementary material for: A good-performance glucose sensor fabricated via rationally designing a new cobalt–metal–organic framework precursor
Source: Royal Society of Chemistry journal article supplement (doi:10.1039/d0nj03403g), 2020-01-01
Supplement: d0nj03403g1.pdf [file d0nj03403g1.pdf]

## **Supporting Information for New Journal of Chemistry**

### **A good-performance glucose sensor by rational designing a new cobalt-metal-organic framework precursor**

Chao Han<sup>a</sup>, Lei Nie<sup>a</sup>, Xiao Han<sup>b</sup>, Xiaoli Zhuang<sup>a</sup>, Jingrui Zhang<sup>a</sup>, Yulan Rui<sup>a</sup>, Wei Meng<sup>a,\*</sup>

<sup>a</sup> College of Chemical Engineering, North China University of Science and Technology, Tangshan, 063009, China; <sup>b</sup> College of Chemical Engineering & Material and Hebei Key Laboratory of Heterocyclic Compounds, Handan University, Handan, 056005, China

\*Corresponding author: Tel.: +86 315 8805462; Fax: +86 315 8805462.

E-mail address: [mengwei@ncst.edu.cn](mailto:mengwei@ncst.edu.cn)

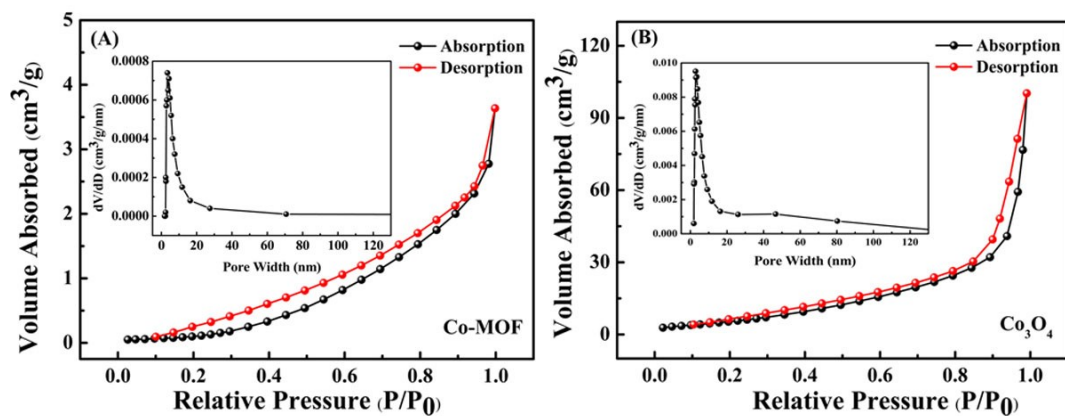

Fig. S1 N<sub>2</sub> adsorption-desorption isotherms and pore size distribution (inset) of (A) Co-MOF and (B) Co<sub>3</sub>O<sub>4</sub>.

**Table S1** The surface area and pore volume of Co-MOF and Co<sub>3</sub>O<sub>4</sub>.

| Samples                        | Surface area (m <sup>2</sup> g <sup>-1</sup> ) |          | Total pore volume<br>(cm <sup>3</sup> g <sup>-1</sup> ) | Distribution centre of pore size<br>(nm) |
|--------------------------------|------------------------------------------------|----------|---------------------------------------------------------|------------------------------------------|
|                                | BET                                            | Langmuir |                                                         |                                          |
| Co-MOF                         | 0.69                                           | 1.47     | 0.0056                                                  | 3.47                                     |
| Co <sub>3</sub> O <sub>4</sub> | 23.63                                          | 41.13    | 0.16                                                    | 2.84                                     |

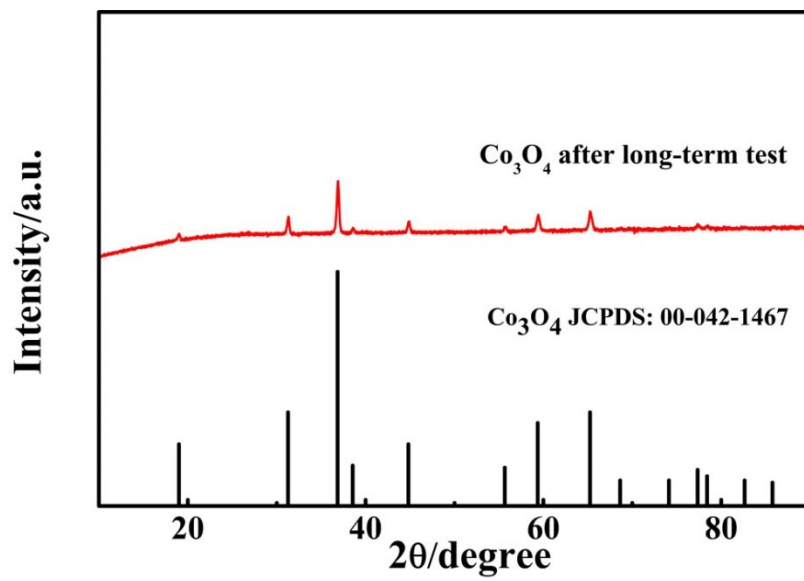

**Fig. S2** The XRD patterns of standard card of  $\text{Co}_3\text{O}_4$  and  $\text{Co}_3\text{O}_4$  after long-term test.

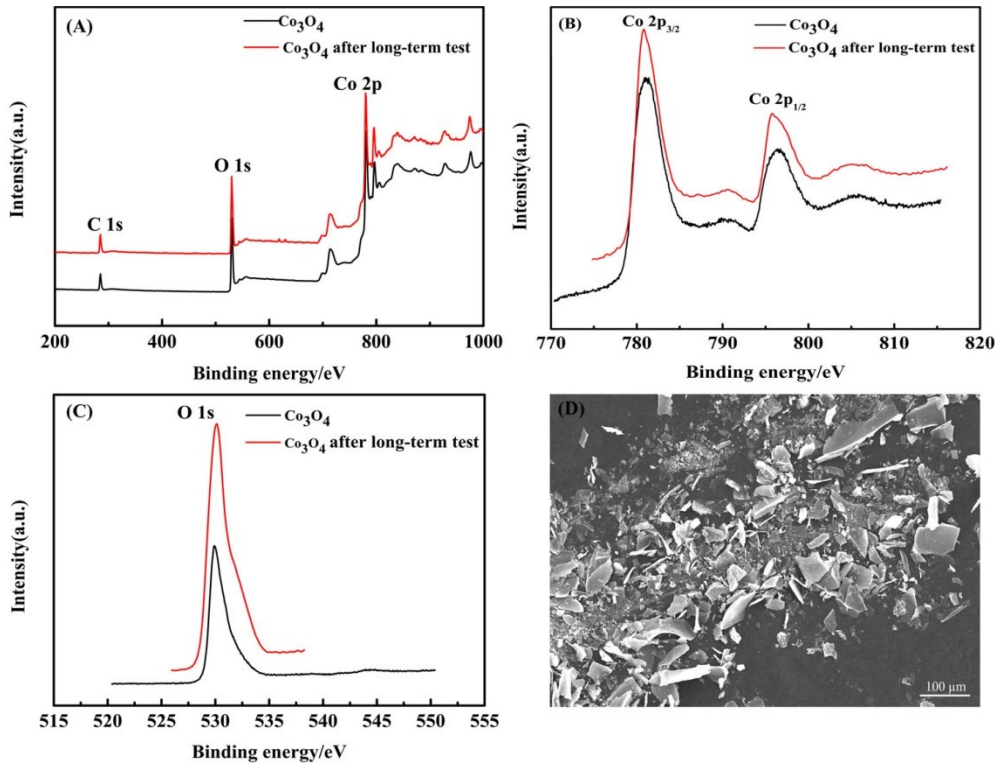

**Fig. S3** The comparisons of XPS spectra of the synthesized  $\text{Co}_3\text{O}_4$  and  $\text{Co}_3\text{O}_4$  after long-term test: (A) full spectra, (B) high-resolution spectra of Co 2p, (C) high-resolution spectra of O 1s and (D) the SEM image of  $\text{Co}_3\text{O}_4$  after long-term test.
